# Supplementary material for: Tamoxifen resistance alters sensitivity to 5-fluorouracil in a subset of estrogen receptor-positive breast cancer
Source: PubMed Central journal article supplement (PMC8186817; doi:10.1371/journal.pone.0252822), 2021-06-08

# S1 Fig

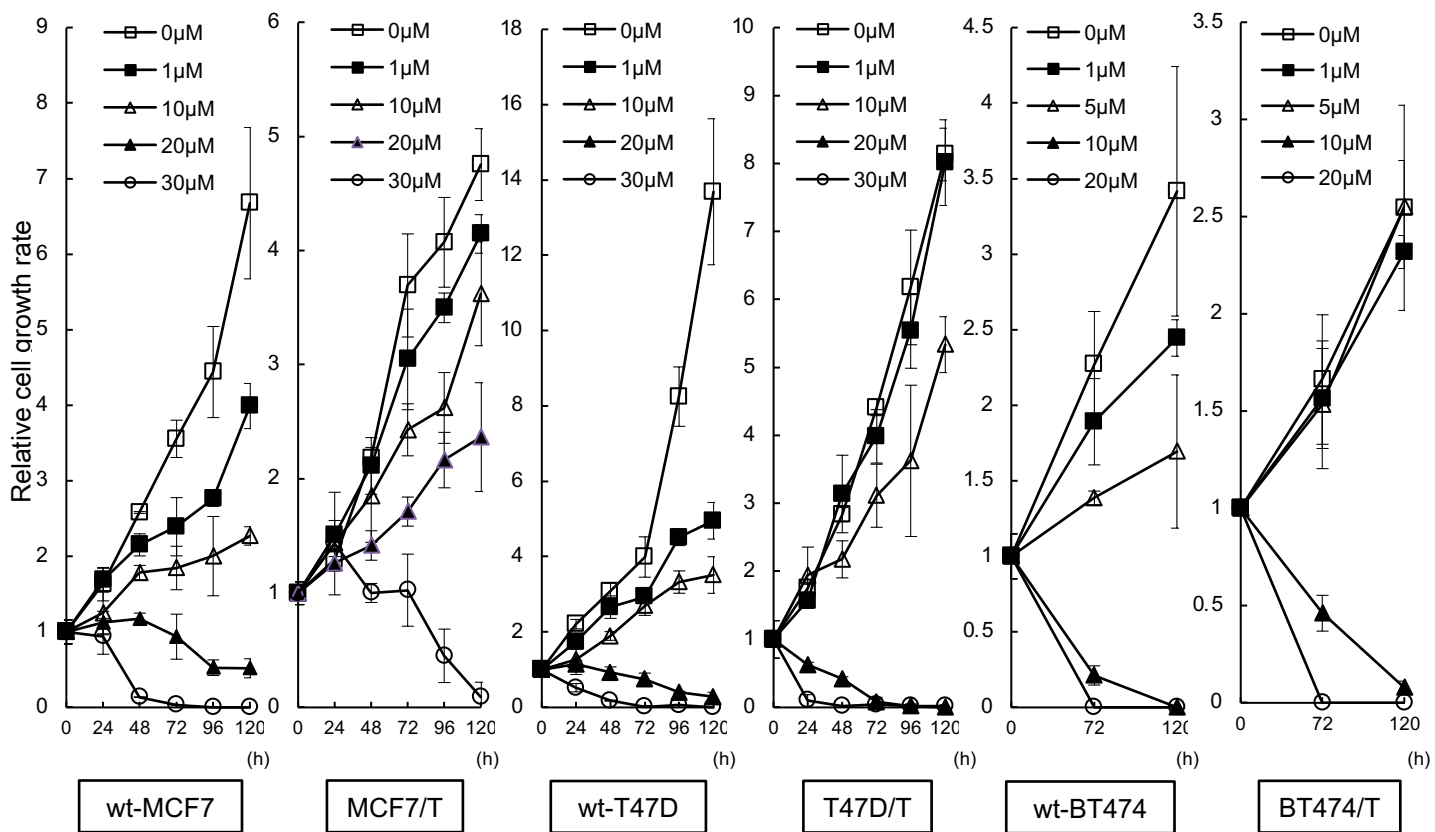

Supplement: pone.0252822.s001.pdf [file pone.0252822.s001.pdf]
