# Supplementary material for: Tamoxifen resistance alters sensitivity to 5-fluorouracil in a subset of estrogen receptor-positive breast cancer
Source: PubMed Central journal article supplement (PMC8186817; doi:10.1371/journal.pone.0252822), 2021-06-08

Uncropped image of Figure 1B

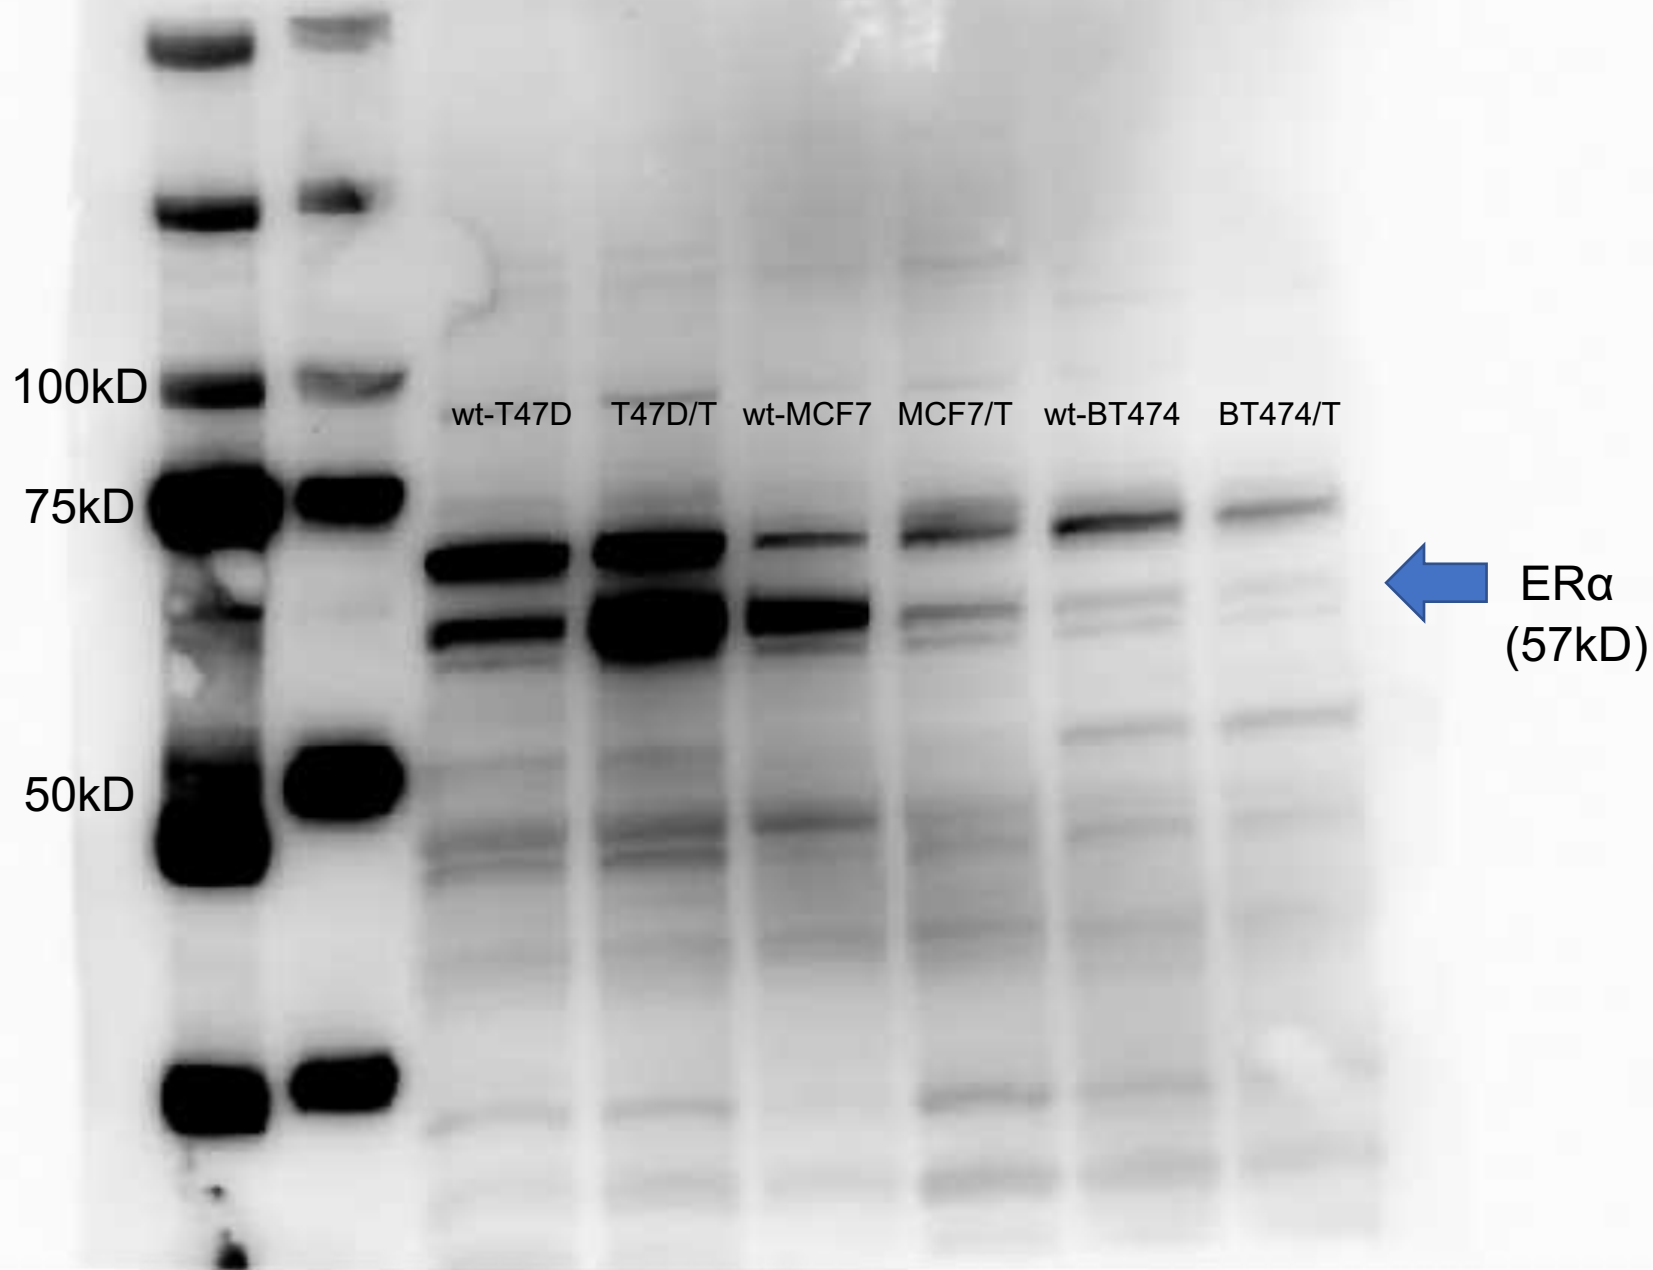

Uncropped image of Figure 1B

150kD

100kD

75kD

wt-T47D T47D/T wt-MCF7 MCF7/T wt-BT474 BT474/T

← PgR  
(115kD)

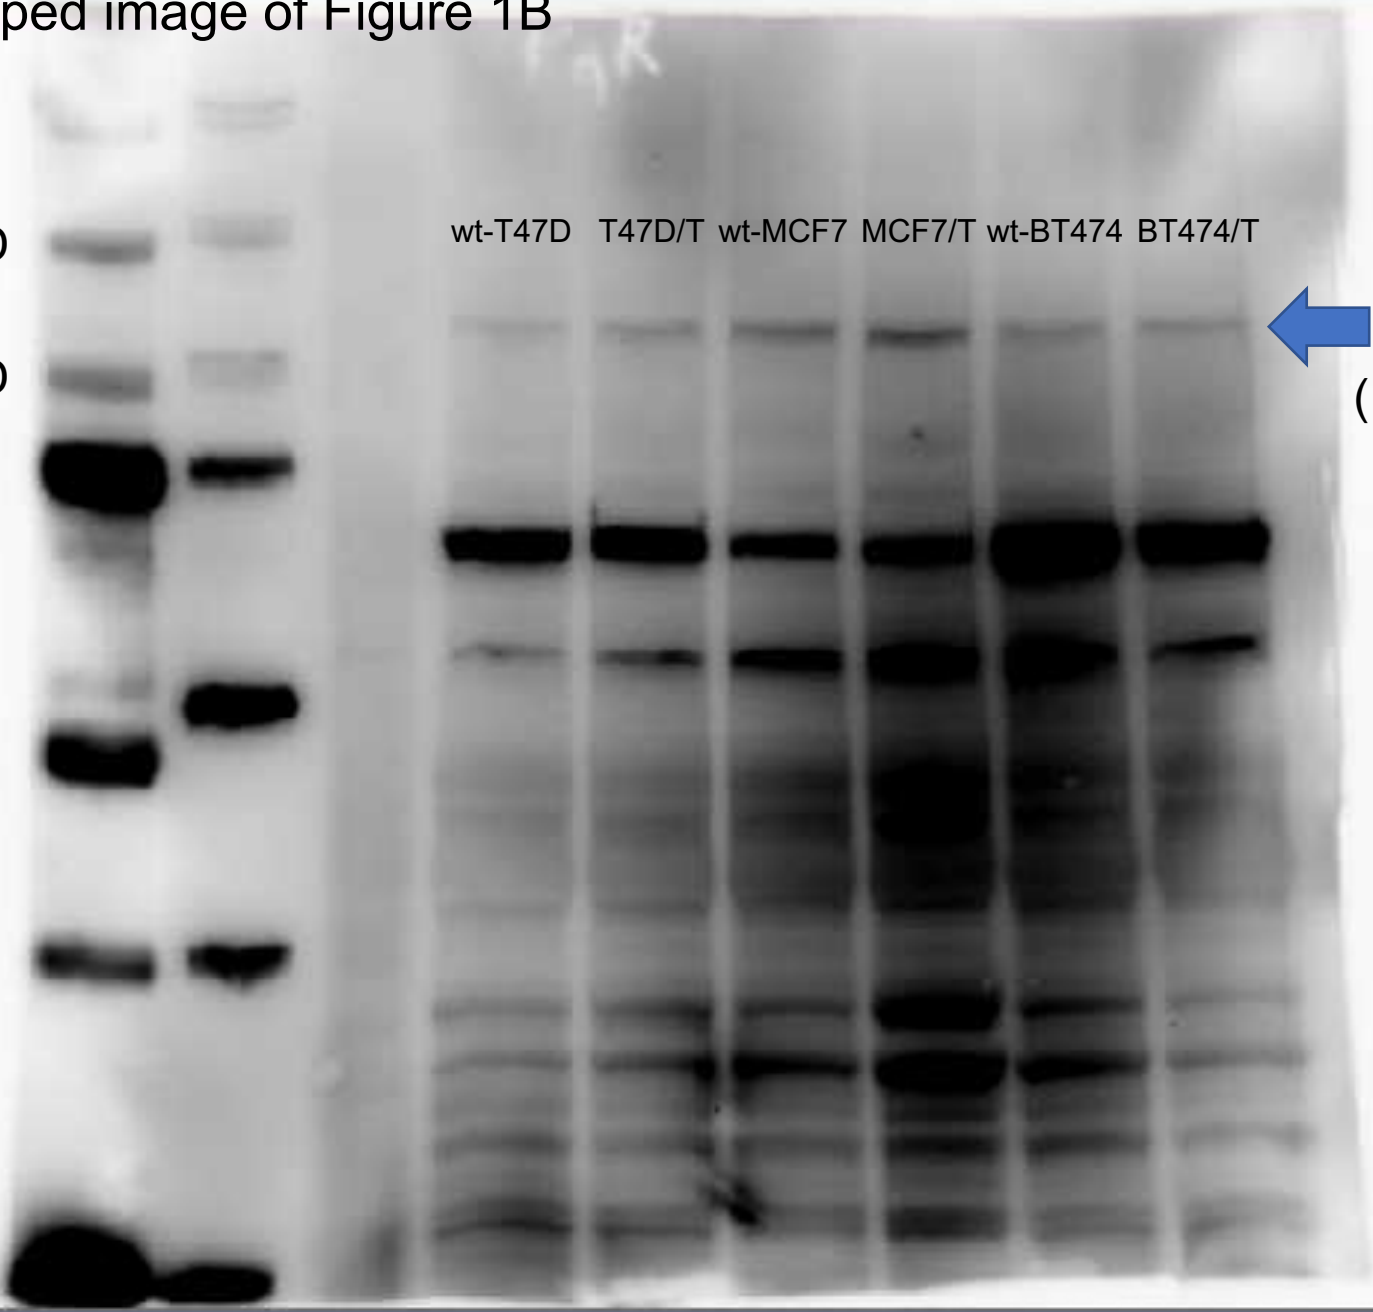

Uncropped image of Figure 1B

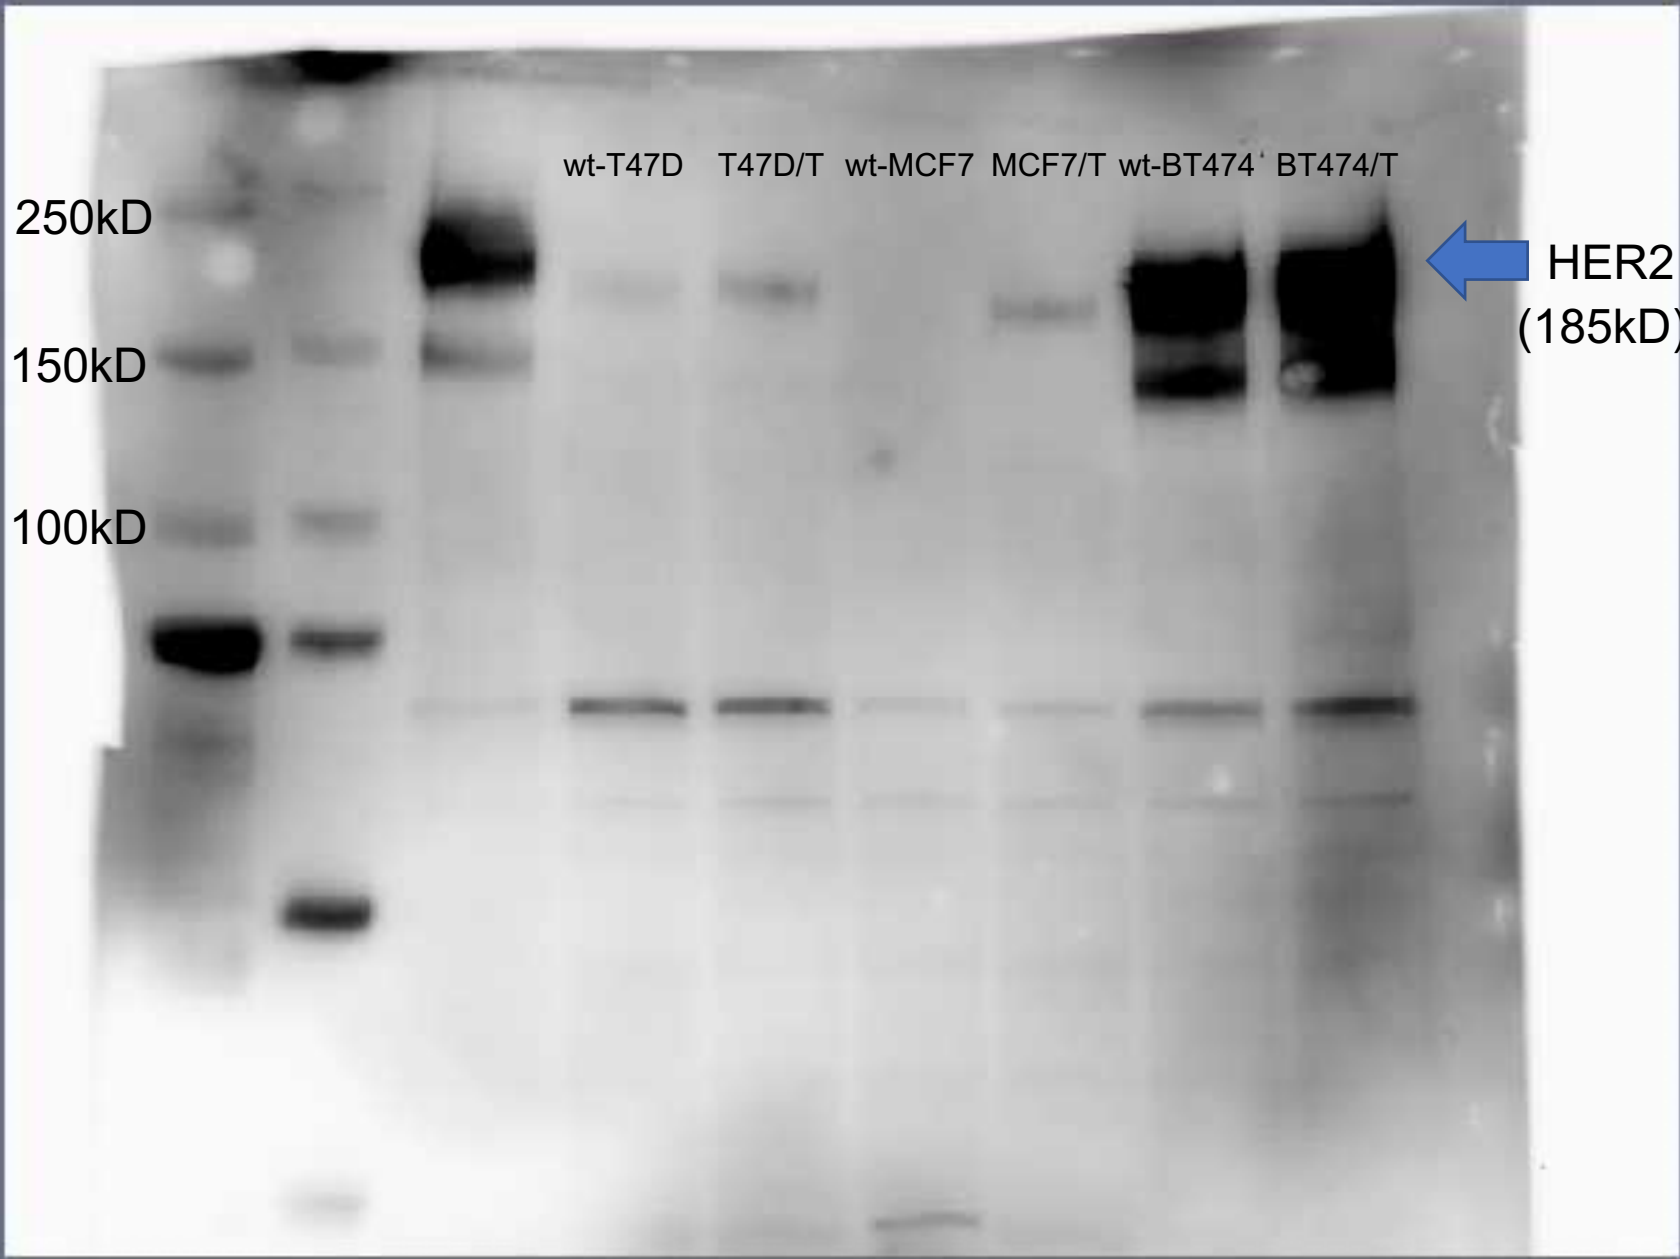

Uncropped image of Figure 1B

75kD

50kD

37kD

wt-T47D T47D/T wt-MCF7 MCF7/T wt-BT474 BT474/T

β-actin (42kD)

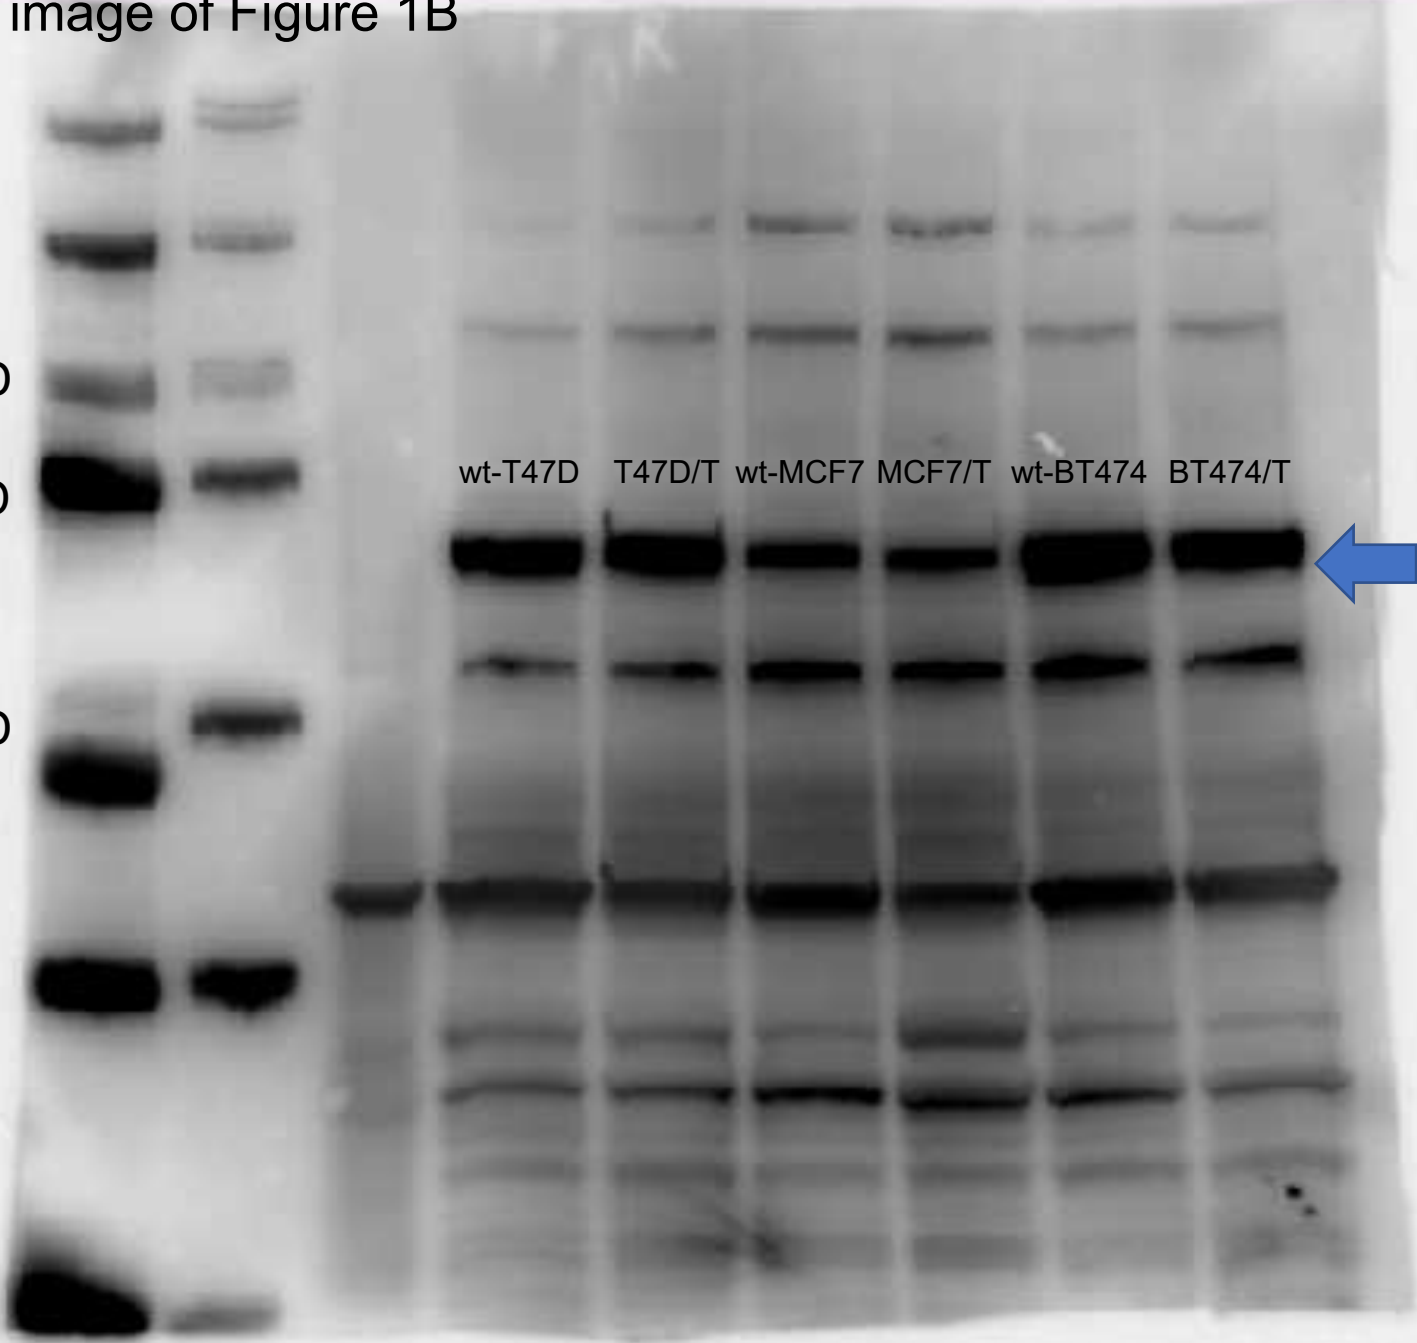

Supplement: pone.0252822.s006.pdf [file pone.0252822.s006.pdf]
